# Supplementary material
Source: publisher site journal article supplement (https://www.dovepress.com/article/215348)
Supplement: Supplementary file 1 [file get_supplementary_file.php]

# 1 **Supplementary information**

## 2 **Supplementary table 1. Proteins and antibodies in the bead array**

3 Suffix indicate that several antibodies were included towards the same protein.

| Gene     | Gene desc                          | Uniprot | Antibody  |
|----------|------------------------------------|---------|-----------|
| A2M      | alpha-2-macroglobulin              | P01023  | HPA002265 |
| CFI      | complement factor I                | P05156  | HPA001143 |
| AGT      | angiotensinogen                    | P01019  | HPA001557 |
| CFB      | complement factor B                | P00751  | HPA001817 |
| APOA1    | apolipoprotein A1                  | P02647  | HPA046715 |
| APOA4.1  | apolipoprotein A4                  | P06727  | HPA001352 |
| APOA4.2  | apolipoprotein A4                  | P06727  | HPA002549 |
| APOA4.3  | apolipoprotein A4                  | P06727  | HPA005149 |
| APOC1    | apolipoprotein C1                  | P02654  | HPA051518 |
| APOE     | apolipoprotein E                   | P02649  | HPA065539 |
| APOE     | apolipoprotein E                   | P02649  | HPA068768 |
| APP      | amyloid beta precursor protein     | P05067  | HPA031303 |
| B4GAT1   | beta-1,4-glucuronyltransferase 1   | O43505  | HPA015484 |
| BTD.1    | biotinidase                        | P43251  | HPA040225 |
| BTD.2    | biotinidase                        | P43251  | HPA052275 |
| C4orf48  | chromosome 4 open reading frame 48 | Q5BLP8  | HPA052447 |
| C7       | complement C7                      | P10643  | HPA067450 |
| CDH2.1   | cadherin 2                         | P19022  | HPA004196 |
| CDH2.2   | cadherin 2                         | P19022  | HPA058574 |
| CFH.1    | complement factor H                | P08603  | HPA005551 |
| CFH.2    | complement factor H                | P08603  | HPA049176 |
| CFH.3    | complement factor H                | P08603  | HPA053326 |
| CHGB.1   | chromogranin B                     | P05060  | HPA008759 |
| CHGB.2   | chromogranin B                     | P05060  | HPA012602 |
| CHGB.3   | chromogranin B                     | P05060  | HPA012872 |
| CHL1     | cell adhesion molecule L1 like     | O00533  | HPA003345 |
| CLSTN1.1 | calsyntenin 1                      | O94985  | HPA012412 |
| CLSTN1.2 | calsyntenin 1                      | O94985  | HPA012749 |
| CLU      | clusterin                          | P10909  | HPA000572 |

|          |                                                       |        |           |
|----------|-------------------------------------------------------|--------|-----------|
| CNTN1.1  | contactin 1                                           | Q12860 | HPA041060 |
| CNTN1.2  | contactin 1                                           | Q12860 | HPA070467 |
| COCH     | cochlin                                               | O43405 | HPA065086 |
| COL6A1.1 | collagen type VI alpha 1 chain                        | P12109 | HPA019142 |
| COL6A1.2 | collagen type VI alpha 1 chain                        | P12109 | HPA029401 |
| COL6A1.3 | collagen type VI alpha 1 chain                        | P12109 | HPA029402 |
| CR1.1    | complement C3b/C4b receptor 1 (Knops blood group)     | P17927 | HPA043579 |
| CR1.2    | complement C3b/C4b receptor 1 (Knops blood group)     | P17927 | HPA042455 |
| DAG1.1   | dystroglycan 1                                        | Q14118 | HPA044662 |
| DAG1.2   | dystroglycan 1                                        | Q14118 | HPA061826 |
| DAG1.3   | dystroglycan 1                                        | Q14118 | HPA070883 |
| DKK3.1   | dickkopf WNT signaling pathway inhibitor 3            | Q9UBP4 | HPA011164 |
| DKK3.2   | dickkopf WNT signaling pathway inhibitor 3            | Q9UBP4 | HPA011868 |
| DKK3.3   | dickkopf WNT signaling pathway inhibitor 3            | Q9UBP4 | HPA063769 |
| EFEMP1.1 | EGF containing fibulin extracellular matrix protein 1 | Q12805 | HPA062231 |
| EFEMP1.2 | EGF containing fibulin extracellular matrix protein 1 | Q12805 | HPA071588 |
| ENPP2.1  | ectonucleotide pyrophosphatase/phosphodiesterase 2    | Q13822 | HPA000434 |
| ENPP2.2  | ectonucleotide pyrophosphatase/phosphodiesterase 2    | Q13822 | HPA023759 |
| ENPP2.3  | ectonucleotide pyrophosphatase/phosphodiesterase 2    | Q13822 | HPA053652 |
| FGFR2.1  | fibroblast growth factor receptor 2                   | P21802 | HPA010693 |
| FGFR2.2  | fibroblast growth factor receptor 2                   | P21802 | HPA010710 |
| FGFR2.3  | fibroblast growth factor receptor 2                   | P21802 | HPA035305 |
| GAB2.1   | GRB2 associated binding protein 2                     | Q9UQC2 | HPA000979 |
| GAB2.2   | GRB2 associated binding protein 2                     | Q9UQC2 | HPA001368 |
| GM2A     | GM2 ganglioside activator                             | P17900 | HPA008063 |
| GSN      | gelsolin                                              | P06396 | HPA070538 |
| HPX.1    | hemopexin                                             | P02790 | HPA065318 |
| HPX.2    | hemopexin                                             | P02790 | HPA068847 |
| KRT1.1   | keratin 1                                             | P04264 | HPA017917 |
| KRT1.2   | keratin 1                                             | P04264 | HPA019797 |
| KRT1.3   | keratin 1                                             | P04264 | HPA062908 |
| LSAMP.1  | limbic system-associated membrane protein             | Q13449 | HPA054051 |
| LSAMP.2  | limbic system-associated membrane protein             | Q13449 | HPA065923 |
| MEGF8.1  | multiple EGF like domains 8                           | Q7Z7M0 | HPA007691 |
| MEGF8.2  | multiple EGF like domains 8                           | Q7Z7M0 | HPA008178 |
| MEGF8.3  | multiple EGF like domains 8                           | Q7Z7M0 | HPA067494 |
| NELL2.1  | neural EGFL like 2                                    | Q99435 | HPA035715 |
| NELL2.2  | neural EGFL like 2                                    | Q99435 | HPA035714 |
| NELL2.3  | neural EGFL like 2                                    | Q99435 | HPA057385 |
| NEO1.1   | neogenin 1                                            | Q92859 | HPA003913 |
| NEO1.2   | neogenin 1                                            | Q92859 | HPA027806 |

|           |                                                                               |               |           |
|-----------|-------------------------------------------------------------------------------|---------------|-----------|
| NRCAM     | neuronal cell adhesion molecule                                               | Q92823        | HPA061433 |
| NRXN1.1   | neurexin 1                                                                    | P58400;Q9ULB1 | HPA053886 |
| NRXN1.2   | neurexin 1                                                                    | P58400;Q9ULB1 | HPA059963 |
| NRXN1.3   | neurexin 1                                                                    | P58400;Q9ULB1 | HPA067588 |
| NUCB1.1   | nucleobindin 1                                                                | Q02818        | HPA007689 |
| NUCB1.2   | nucleobindin 1                                                                | Q02818        | HPA008176 |
| OGN       | osteoglycin                                                                   | P20774        | HPA015482 |
| PCSK1N    | proprotein convertase subtilisin/kexin type 1 inhibitor                       | Q9UHG2        | HPA064734 |
| PLG.1     | plasminogen                                                                   | P00747        | HPA021602 |
| PLG.2     | plasminogen                                                                   | P00747        | HPA048823 |
| PTGDS.1   | prostaglandin D2 synthase                                                     | P41222        | HPA004938 |
| PTGDS.2   | prostaglandin D2 synthase                                                     | P41222        | HPA067456 |
| SCG3.1    | secretogranin III                                                             | Q8WXD2        | HPA006880 |
| SCG3.2    | secretogranin III                                                             | Q8WXD2        | HPA007213 |
| SCG3.3    | secretogranin III                                                             | Q8WXD2        | HPA053715 |
| SEBOX     | SEBOX homeobox                                                                | Q9HB31        | HPA045689 |
| SERPIND1  | serpin family D member 1                                                      | P05546        | HPA055767 |
| SOD1      | superoxide dismutase 1                                                        | P00441        | HPA001401 |
| SOD3      | superoxide dismutase 3                                                        | P08294        | HPA042110 |
| SPARCL1.1 | SPARC like 1                                                                  | Q14515        | HPA059084 |
| SPARCL1.2 | SPARC like 1                                                                  | Q14515        | HPA067641 |
| TIMP1     | TIMP metalloproteinase inhibitor 1                                            | P01033        | HPA053417 |
| VGf.1     | VGf nerve growth factor inducible                                             | O15240        | HPA055177 |
| VGf.2     | VGf nerve growth factor inducible                                             | O15240        | HPA058371 |
| VGf.3     | VGf nerve growth factor inducible                                             | O15240        | HPA072505 |
| VTN       | vitronectin                                                                   | P04004        | HPA068011 |
| WFIKK2.1  | WAP, follistatin/kazal, immunoglobulin, kunitz and netrin domain containing 2 | Q8TEU8        | HPA010953 |
| WFIKK2.2  | WAP, follistatin/kazal, immunoglobulin, kunitz and netrin domain containing 2 | Q8TEU8        | HPA010954 |

5 **Supplementary table 2. Results from the multivariate analysis**

6 2A) Proteins with absolute  $p(\text{corr}) \geq 0.5$  in the model discriminating NP1 to C1 (model 1).

7 Suffix indicate that multiple antibodies were included towards the same protein.

| Protein | Predictive loading | P(corr) |
|---------|--------------------|---------|
| APOC1   | -0,21              | -0.57   |
| KRT1.1  | 0,20               | 0.56    |
| APOA1   | 0,19               | 0.52    |
| NRXN1.2 | 0,185              | 0.51    |

8

9 2B) Proteins with absolute  $p(\text{corr}) \geq 0.5$  in the model discriminating NP2 to C3 (model 2).

10 Suffix indicate that multiple antibodies were included towards the same protein.

| Protein  | Predictive loadings | $p(\text{corr})$ |
|----------|---------------------|------------------|
| PTGDS.1  | 0.18                | 0.67             |
| SOD1     | 0.18                | 0.66             |
| SOD3     | 0.17                | 0.63             |
| CHGB.3   | -0.17               | -0.62            |
| DKK3.1   | 0.16                | 0.59             |
| CHGB.2   | -0.16               | -0.59            |
| LSAMP.1  | 0.16                | 0.58             |
| APOA1    | 0.16                | 0.58             |
| WFIKK2.1 | 0.16                | 0.58             |
| PTGDS.2  | 0.15                | 0.57             |
| GAB2.1   | 0.15                | 0.56             |
| LYNX1    | 0.15                | 0.56             |
| APP      | 0.15                | 0.54             |
| DAG1.1   | 0.14                | 0.53             |
| ENPP2.1  | 0.14                | 0.52             |
| DAG1.2   | 0.14                | 0.51             |

11

12

- 13 2C) Proteins with absolute  $p(\text{corr}) \geq 0.5$  in the model discriminating FM to C2. Suffix indicate  
 14 that multiple antibodies were included towards the same protein.

| Protein | Predictive loadings | $p(\text{corr})$ |
|---------|---------------------|------------------|
| ENPP2.3 | 0.22                | 0.69             |
| SOD1    | 0.21                | 0.65             |
| CLU     | 0.19                | 0.58             |
| HPX.2   | 0.18                | 0.56             |
| SOD3    | 0.18                | 0.55             |
| PCSK1N  | 0.17                | 0.54             |
| PTGDS.2 | 0.16                | 0.50             |

15

16 **Supplementary table 3. Results from the IC-MS**

17 Proteins detected in immunocapture-mass spectrometry for antibodies targeting APOC1 and  
 18 ENPP2

| Antibody  | Captured protein | Z-score | LFQ Intensity |
|-----------|------------------|---------|---------------|
| HPA051518 | APOC1            | 2.59    | 1765450000    |
|           | APOA1            | 2.59    | 2345550000    |
|           | APOE             | 2.59    | 1558700000    |
| HPA053652 | ENPP2            | 2.60    | 54462500      |
|           | COL6A3           | 2.61    | 28598500      |
|           | MYH7             | 2.61    | 52166000      |
|           | F2               | 2.57    | 57414000      |

19

20

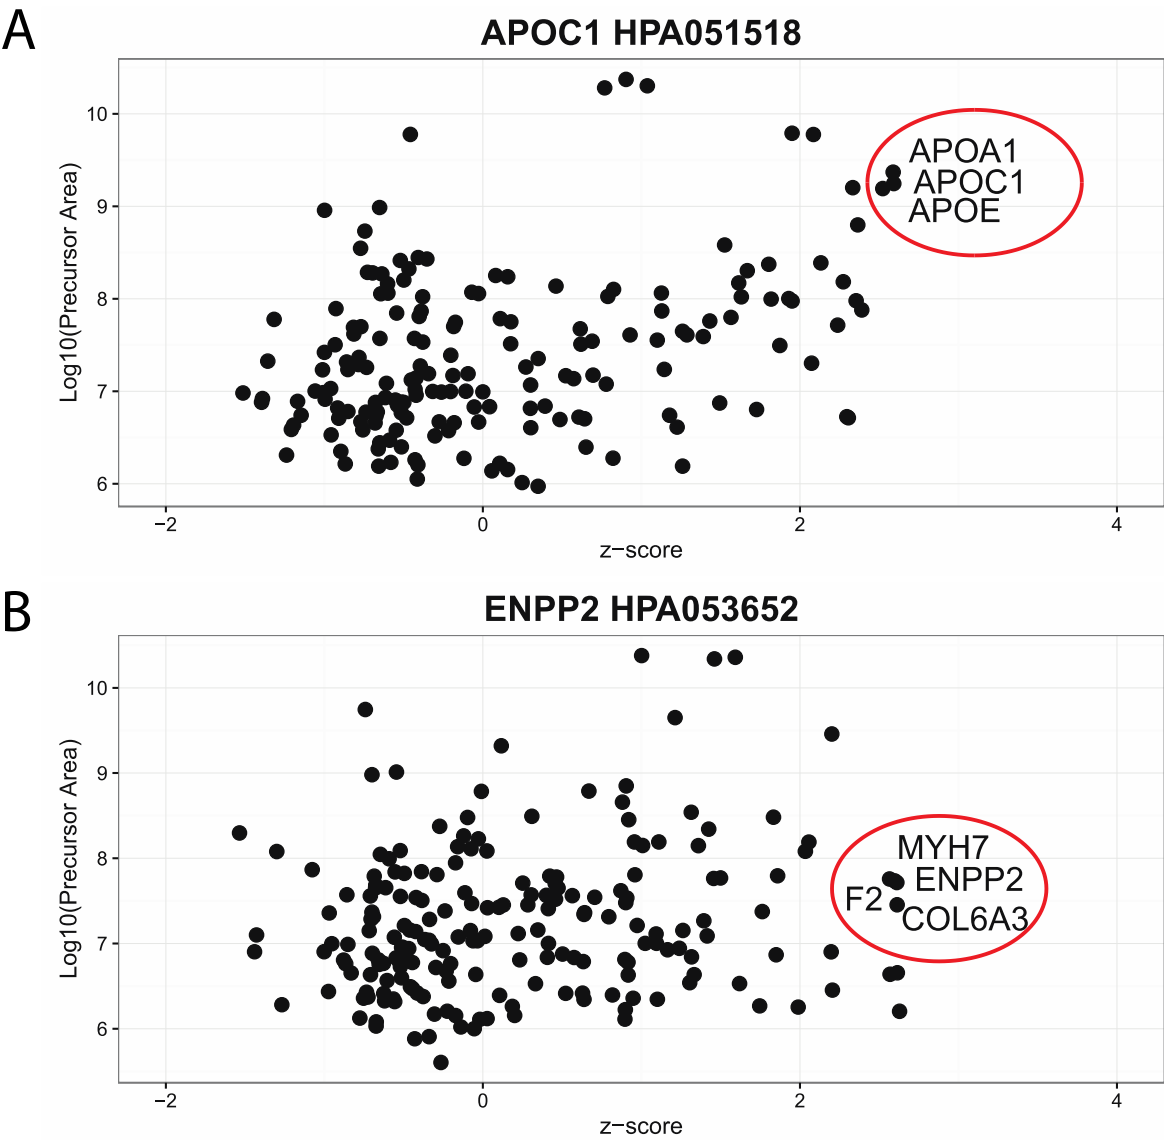

**23 Supplementary figure 1. Results from the IC-MS**

24 Z-score/LFQ-intensity plots for specificity and selectivity of the anti-APOC1 and anti-  
25 ENPP2 antibodies.



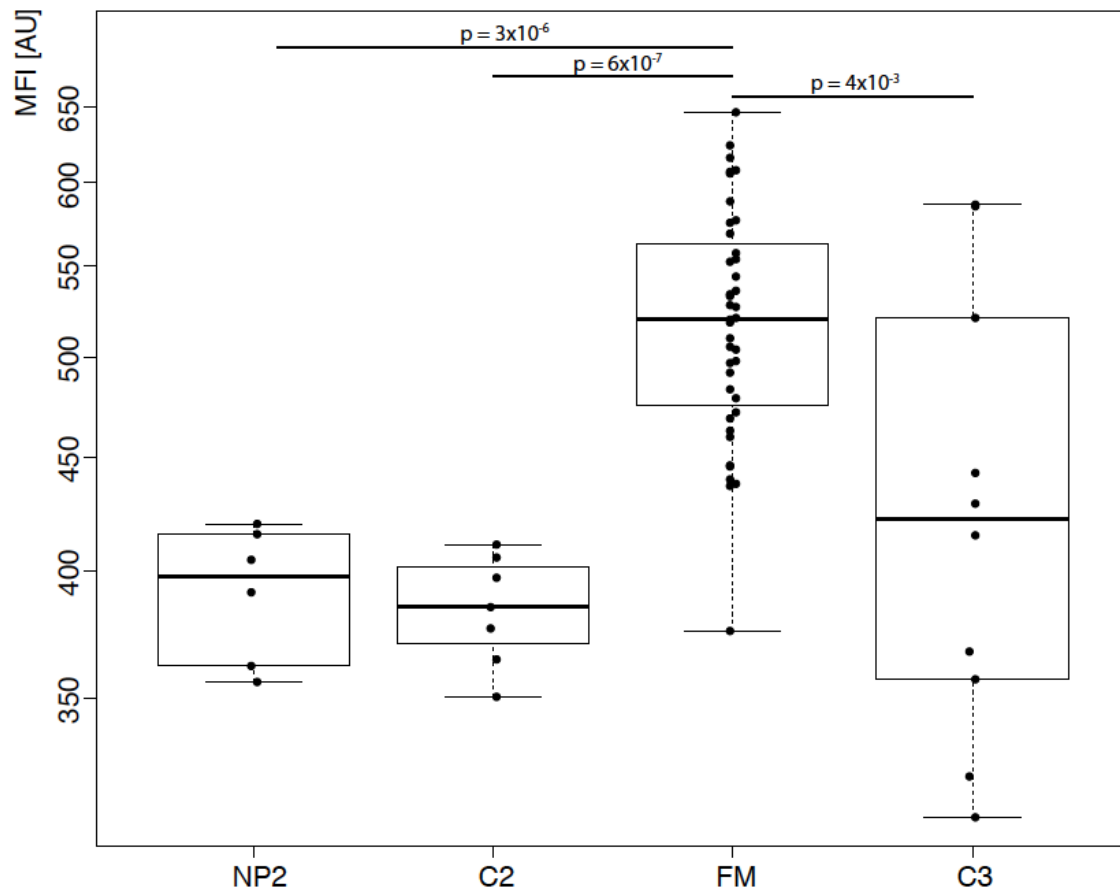

**Supplementary figure 2.**

ENPP2 levels in female samples of controls (C2, n=7; C3, n = 9), neuropathic pain patients (NP2, n = 6) and fibromyalgia patients (FM, n = 40). FM patient levels were significantly higher than all other groups.

## **Supplementary methods: Patient inclusion and sample collection**

### **Fibromyalgia patient samples (FM)**

Patients were recruited by study information which was distributed to members by the Norwegian Fibromyalgia Association. Forty females (ages 20-60) suffering from FM as defined by the 1990 criteria of the American College of Rheumatology (ACR) were included. The diagnosis was confirmed or established by a consultant in rheumatology. Patients were excluded from participation if any verified organic cause of the pain condition was found, or if there was an organic condition probably influencing the symptoms of FM. Moreover, any history of serious medical illness, or current or previous DSM-IV diagnosis of mood disorders (last 12 months), anxiety disorders, psychotic disorder, dementia, epilepsy, seizure disorders, alcohol or drug abuse led to exclusion. All patients underwent a structured psychiatric interview for DSM-IV and Montgomery-Aasberg Depression Rating Scale.

Lumbar puncture was performed fasting between eight and nine in the morning. Ten ml of CSF was obtained and immediately put on dry ice for cooling and freezing, and afterwards stored in an ultra-freezer. None of the patients received any psychotropic medication at the time of the lumbar puncture.

### **Neuropathic pain patient samples**

CSF samples were collected from fasting patients underwent lumbar puncture by a thin low-traumatic spinal needle. After removal of the first sample aliquots to avoid blood contamination of the CSF from potential puncture bleeding, the samples were collected in

polypropylene tubes, which were sealed, gently mixed and put on ice. The samples were centrifuged at 1,300 g for 10 min at 4°C and decanted to remove cells, visually inspected for blood contamination, aliquoted in 1 mL cryotubes and stored at -70°C until analysis.

## ***NP1***

14 patients from Uppsala Academic Hospital (mean age 57 (47-68), 4 males) with long lasting neuropathic pain (median 10 years, range 3-23 years), and permanently implanted SCS since more than three months (median 3 years, range 1-10 years) with self-reported good pain relief, were included in the study. Pain diagnoses were radiculopathy (n=10), post-surgical pain (n=1), phantom limb pain (n=1), low back pain (n=1) and polyneuropathy (n=1). For patient characteristics see Table 1. Neuropathic pain patients underwent two consecutive lumbar punctures, resulting in 28 paired CSF samples. Before the first lumbar puncture their stimulator was turned off for 48 hours (except for one patient who chose 24h), and medications were kept constant. After three weeks of normal SCS use the patients returned for the second lumbar puncture.

## ***NP2***

Eleven pain patients participating in a clinical trial of intrathecal bolus injections of the analgesic ziconotide (ClinicalTrials.gov identifier NCT01373983) were recruited. Inclusion criteria were: 1) patient, at least 18 years of age, suffering from chronic ( $\geq 6$  months) neuropathic pain due to trauma or surgery, who had failed on conventional pharmacological treatment; 2) average visual analog scale pain intensity last week  $\geq 40$  mm; 3) patient capable

of judgment, ie, able to understand information regarding the drug, the mode of administration, and evaluation of efficacy and side effects; and 4) signed informed consent.

Exclusion criteria were: 1) limited life expectancy (investigator's judgment); 2) intrathecal chemotherapy; 3) known or suspected intracranial hypertension; 4) known liver or kidney disease, defined as serum transaminases, total bilirubin, alkaline phosphatase or creatinine  $>1.2\times$  upper limit of normal; 5) advanced cardio-pulmonary disease (investigator's judgment); 6) ongoing infection, whether systemically or locally in the lumbar area; 7) coagulopathy (including medication with warfarin, clopidogrel, and heparin); 8) allergy to ziconotide or any of the excipients in the ziconotide vial; 9) history of psychiatric disorders, which in the investigator's opinion would put the patient at risk; 10) pregnant or lactating woman; and/or 11) participation in another clinical trial during the last 30 days.

After informed consent was received, the following data were registered: basic demographic data; pain diagnosis; pain duration; present and past medical history; and concomitant medication. A medical examination was performed. All patients had at least probable neuropathic pain according to the criteria published by Treede et al <sup>9</sup> and all were or had been candidates for SCS. After CSF sampling, the patients received an intrathecal bolus injection of ziconotide according to the protocol of the clinical trial (ClinicalTrials.gov NCT01373983).

## 91    **Control samples**

### 92    *C1 and C3*

93    CSF was collected at the Cluj Hospital, Romania from 124 individuals without neurological  
94    complaints undergoing spinal anesthesia for planned minor urology surgeries, these were  
95    analyzed in two separate runs making them two samples sets, the first one with 96 samples  
96    (age range 21-81 (mean = 60; median = 65), 92 males) and the second one with 28 samples  
97    (age range 21-89 (mean = 51; median = 55), males 19). Samples were collected according to  
98    the same protocol as NP1.

### 99    *C2*

100    For one of the neuropathic pain patient sample sets (n=11) there was a dedicated control  
101    sample set (n=11) collected simultaneous to the pain samples at the same site from healthy  
102    volunteers recruited via a local at the Faculty of Health Sciences, Linköping University,  
103    Sweden, and by contacting healthy subjects from earlier studies. After informed consent, a  
104    structured interview covering multiple physical and psychological aspects was conducted to  
105    ensure the absence of any significant medical condition (for further details see publication <sup>32</sup>.  
106    A medical examination was performed, including assessment for fibromyalgia tender points.  
107    Intrathecal access was obtained by lumbar puncture and a 10 ml sample of CSF was taken.  
108    The sample was immediately cooled on ice and transported to the Painomics® laboratory,  
109    Linköping University Hospital, where it was visually checked for blood contamination,  
110    centrifuged and divided in aliquots and stored at -70° C until analysis.
